# Supplementary material for: Classifying a Highly Polymorphic Tree Species across Landscapes Using Airborne Imaging Spectroscopy
Source: Preprints.org preprint supplement (doi:10.20944/preprints202307.1570.v1), 2023-07-24
Supplement: Supplementary file 3 [file supplementary]

**Supplemental Information:** Classifying a highly polymorphic tree species across landscapes using airborne imaging spectroscopy

Seeley, M. M.; Vaughn, N. R.; Shanks, B.; Martin, R. E.; König, M; Asner, G. A.

**Figures**


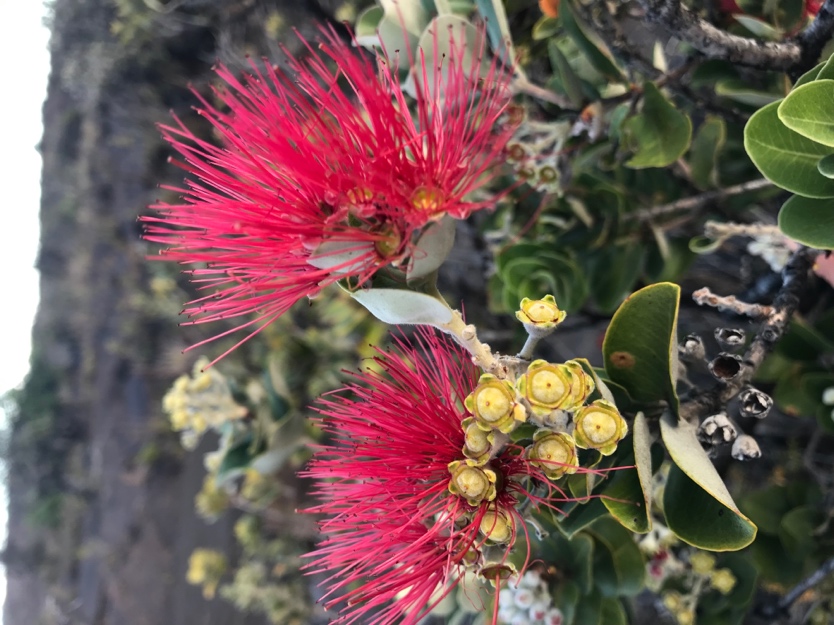


**Figure S1:** *Metrosideros polymorpha* ('ohi'a lehua) in bloom.


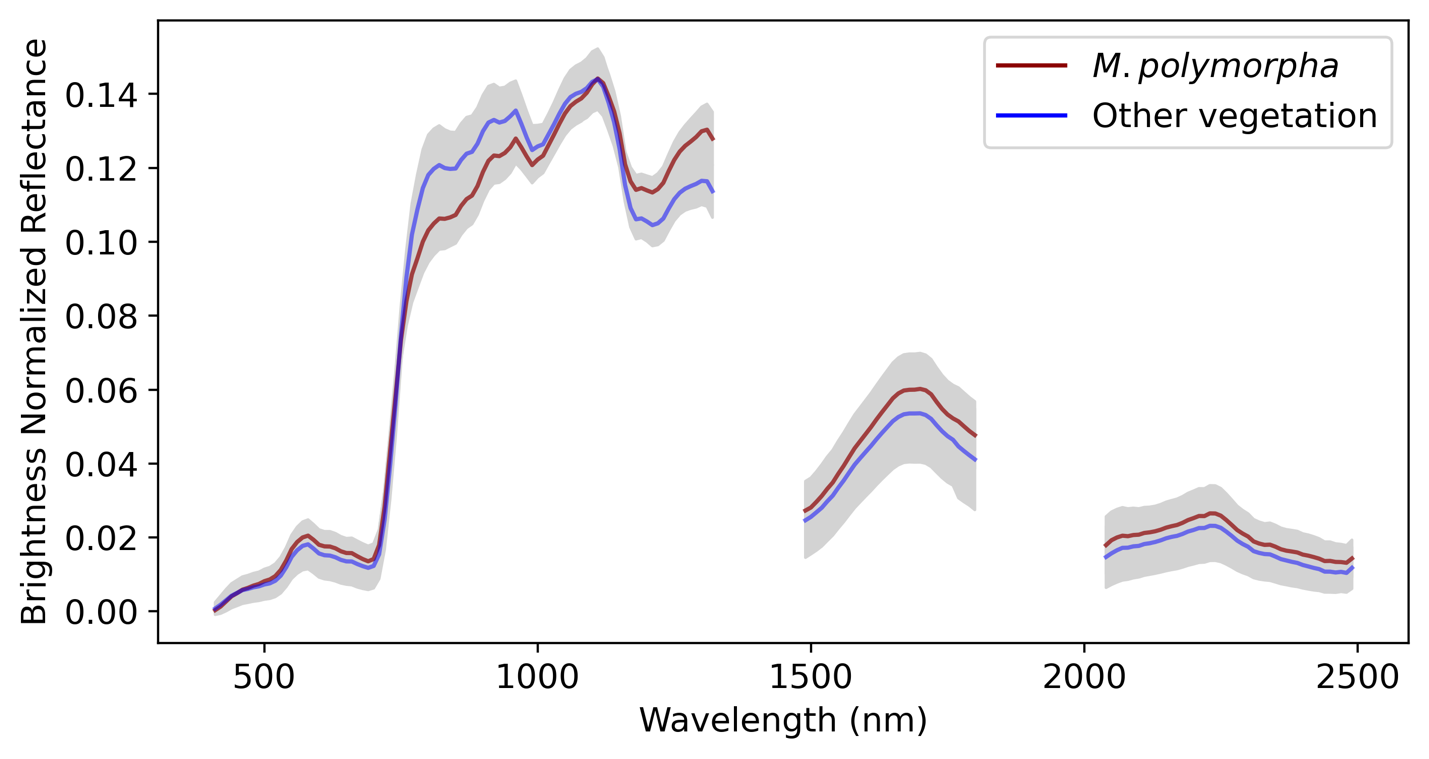


**Figure S2:** Mean spectra of *Metrosideros polymorpha* and other vegetation in spectral library.


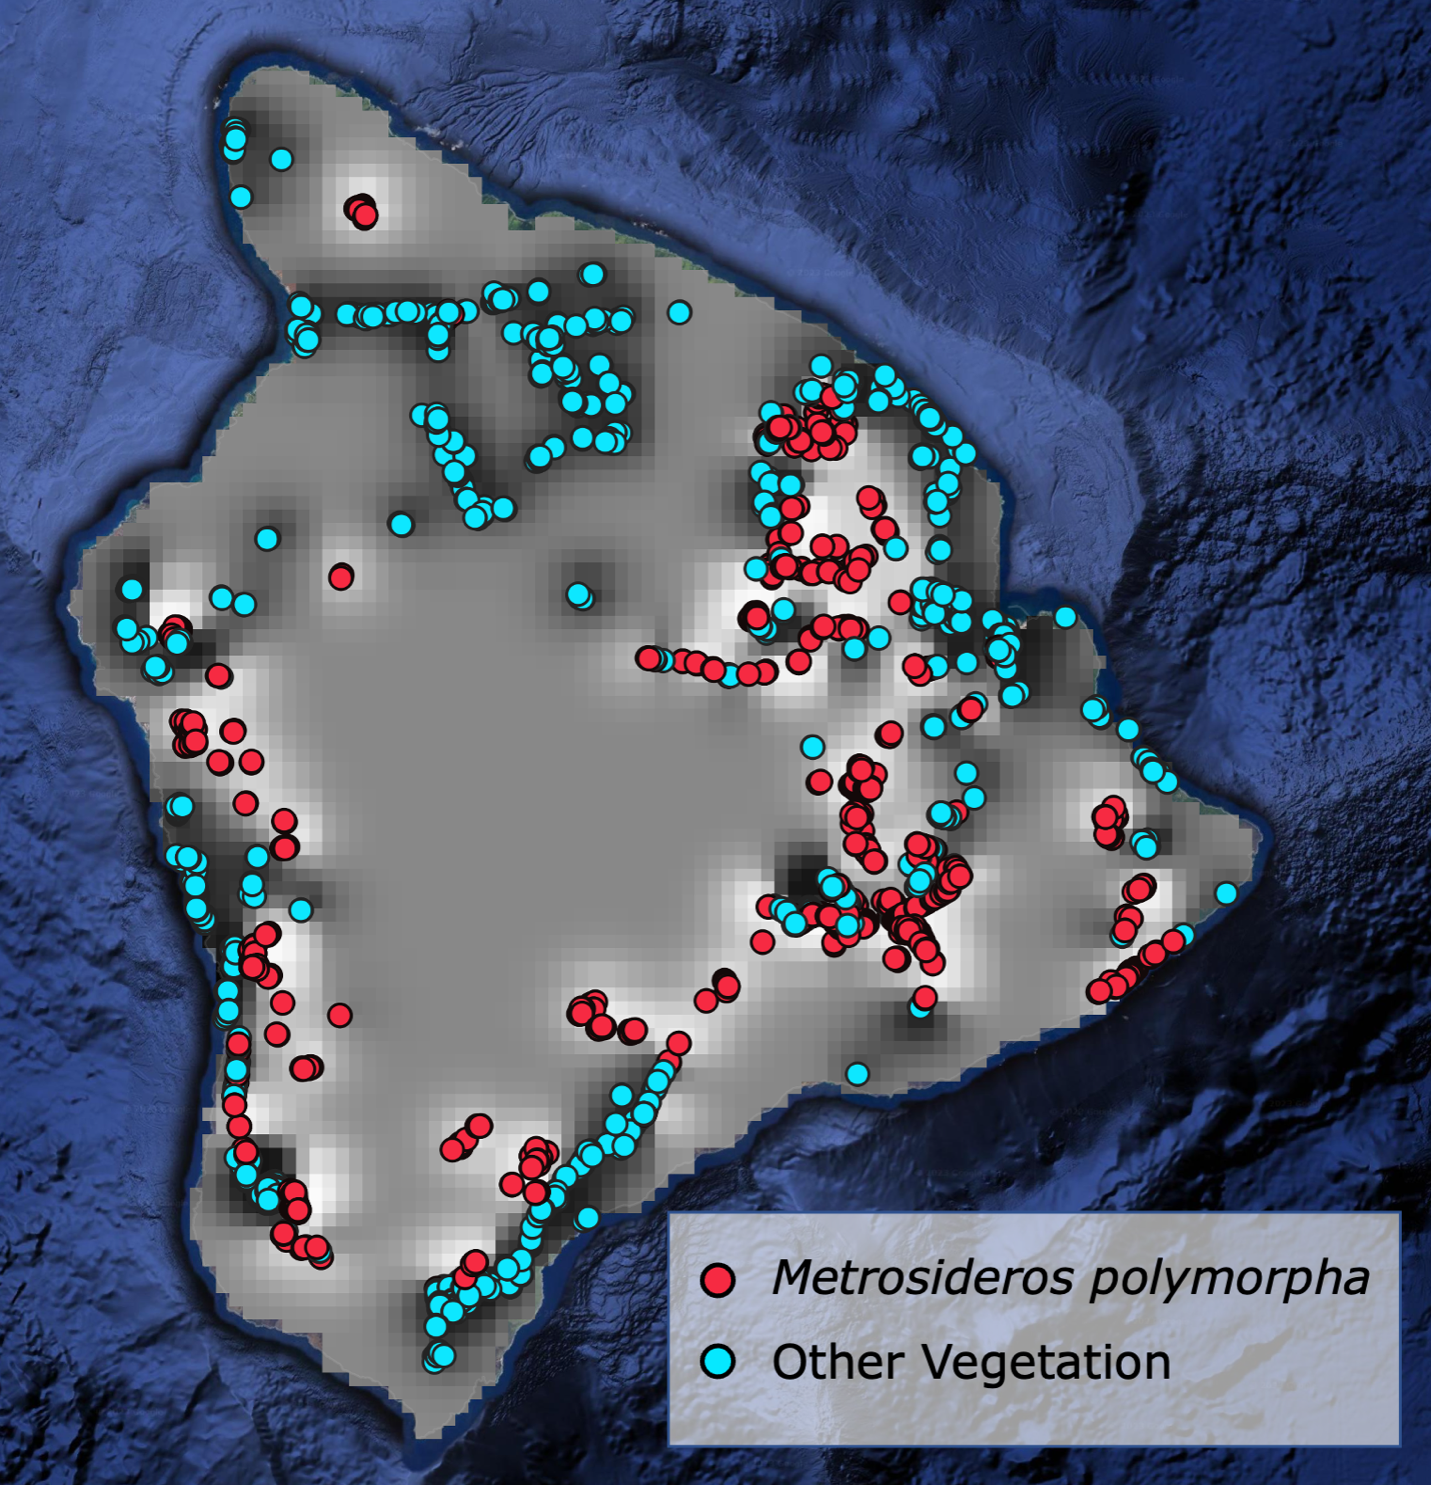


**Figure S3:** Location of the 5366 crowns collected across Hawai'i Island to train the classification models. Red represents all *Metrosideros polymorpha* canopies, and blue are all other vegetation types. Heatmap and contour lines are the gaussian process classification where white represents locations not likely to be *M. polymorpha*, and darker locations represent regions of high *M. polymorpha* likelihood.


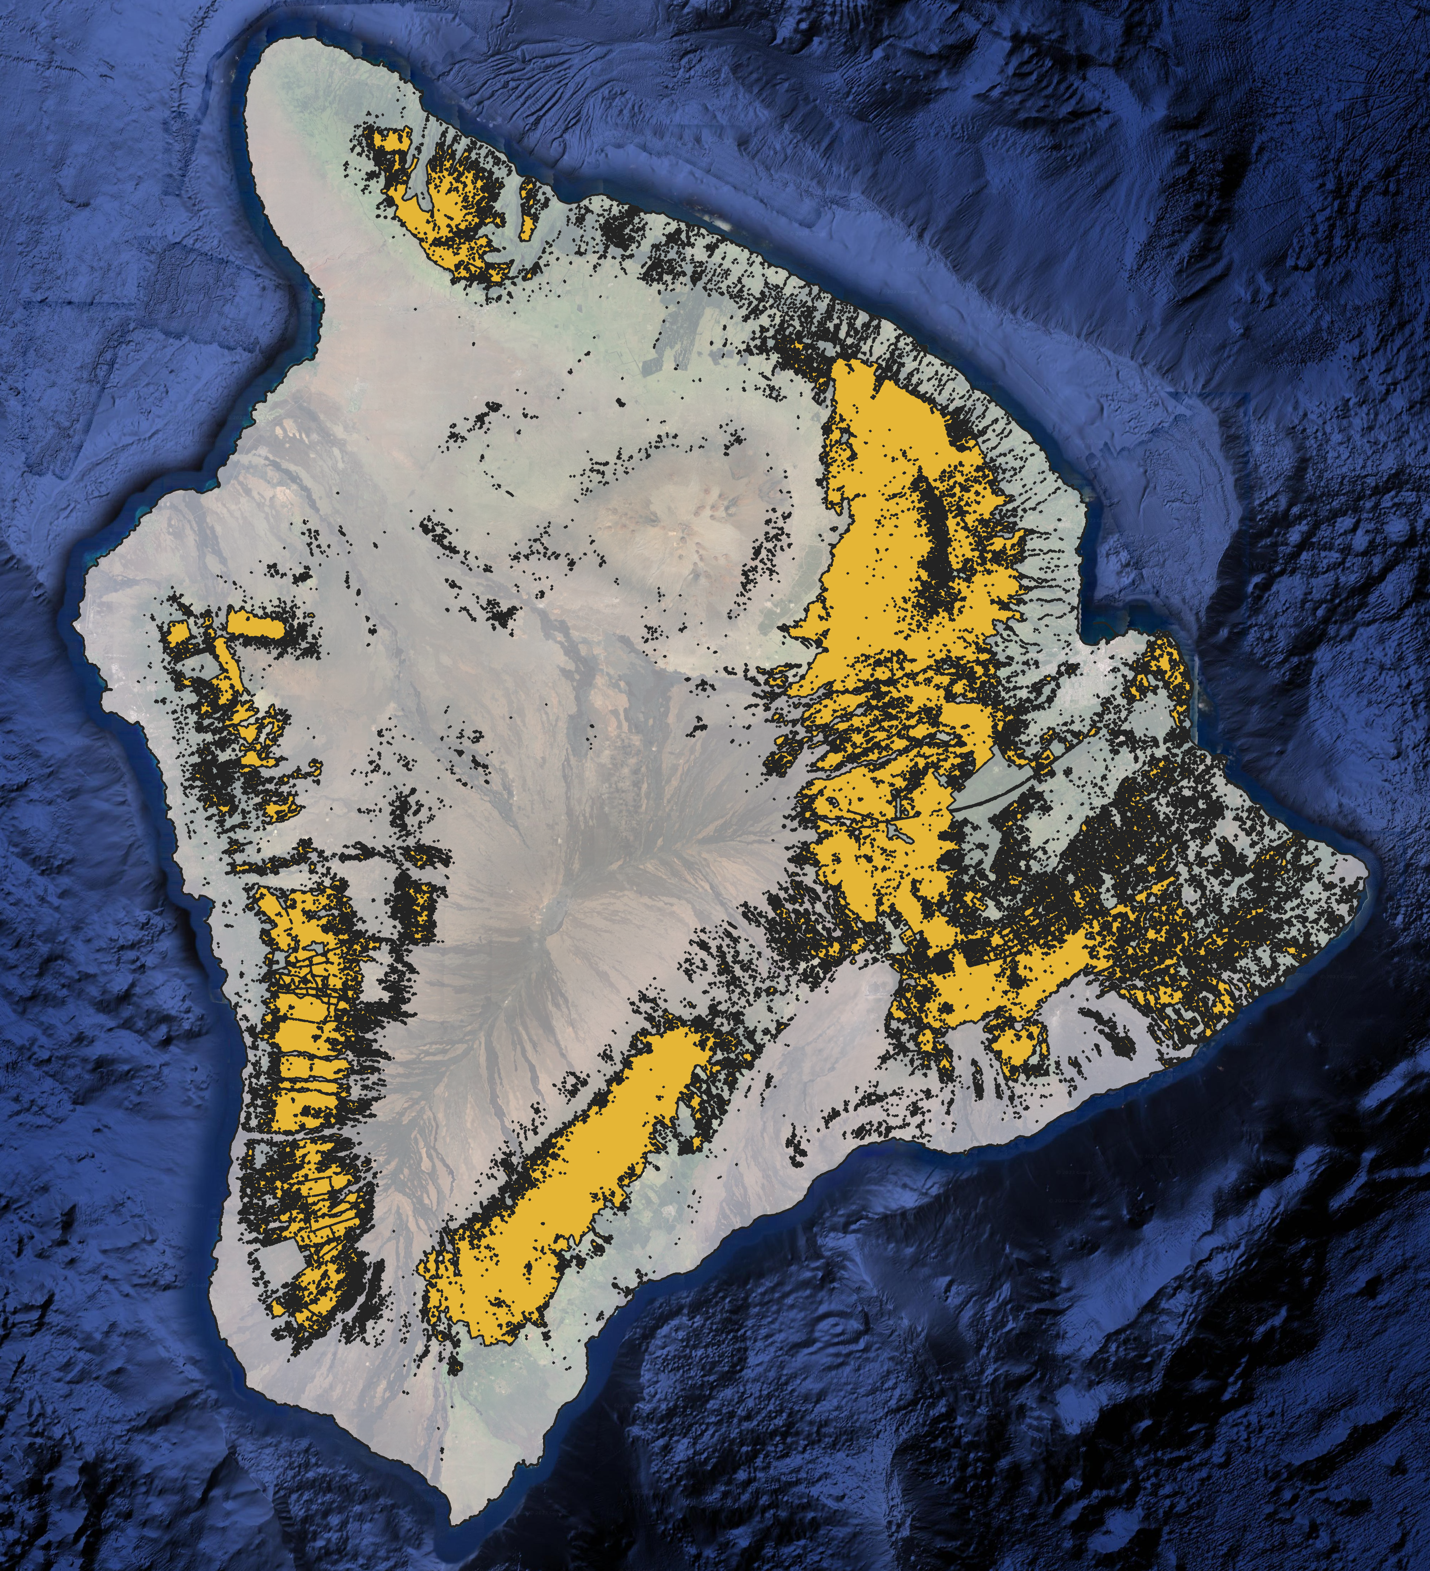


**Figure S4:** 2001 HI-GAP *M. polymorpha* extent as estimated using Landsat data
